# Supplementary material for: A novel small molecule LLL12B inhibits STAT3 signaling and sensitizes ovarian cancer cell to paclitaxel and cisplatin
Source: PubMed Central journal article supplement (PMC8081214; doi:10.1371/journal.pone.0240145), 2021-04-28

LLL12B( $\mu$ M) 0 0.25 0.5 1.0

## A2780

p-STAT3(86)

Amersham Imager 680

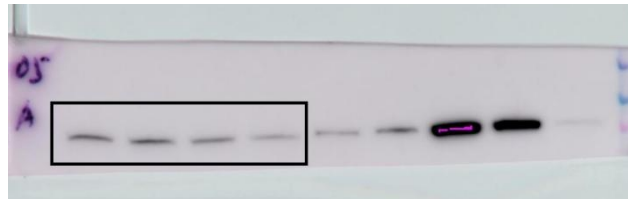

STAT3(86)

Amersham Imager 680

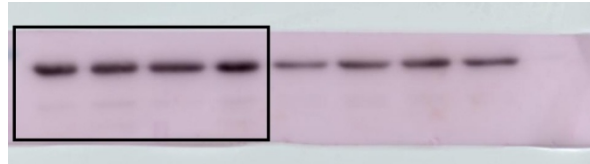

C-myc(51)

Amersham Imager 680

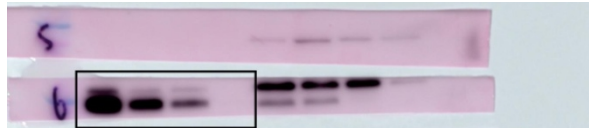

CyclinD1(36)

Amersham Imager 680

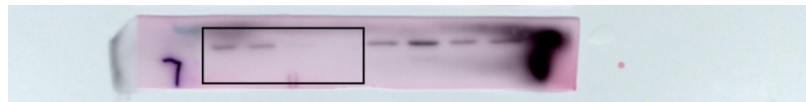

Survivin(16)

Amersham Imager 680

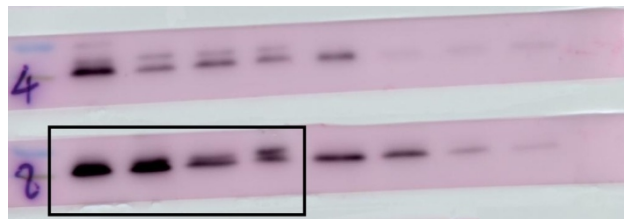

GAPDH(36)

Amersham Imager 680

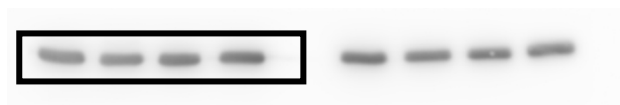

Cleaved caspase3(19)

LLL12B( $\mu$ M) 1.0 0.5 0.25 0

Storm scanner

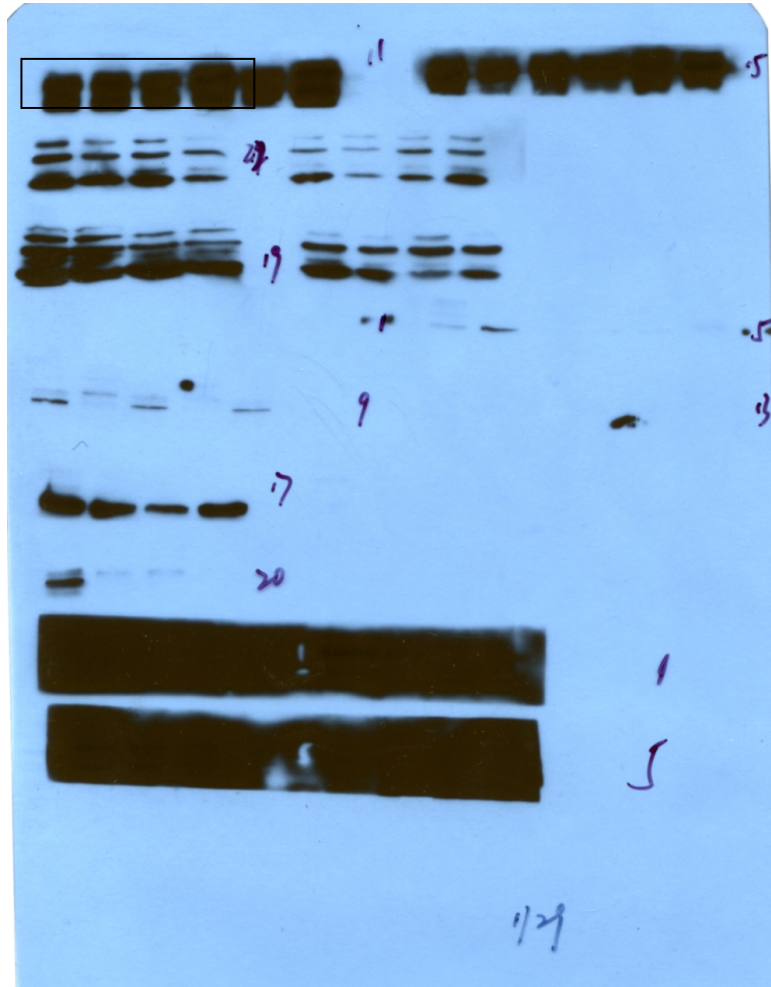

# skov3

LLL12B( $\mu$ M) 0 0.5 1.0 2.5

p-STAT3(86)

Amersham Imager 680

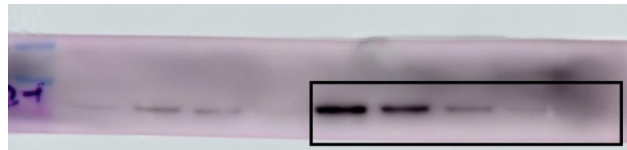

STAT3(86)

Amersham Imager 680

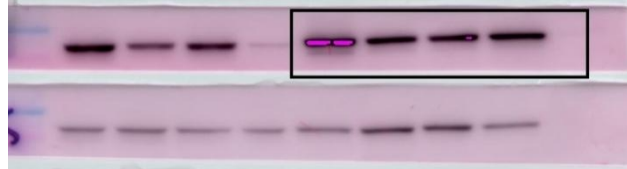

CyclinD1(36)

Amersham Imager 680

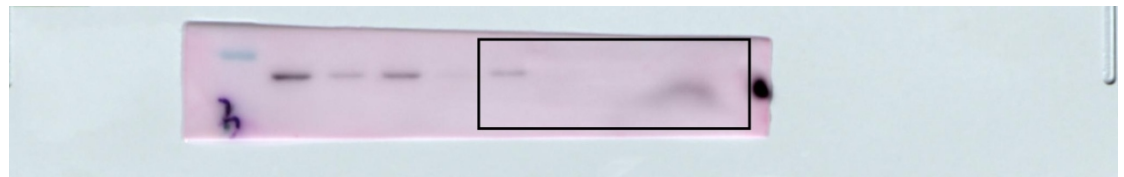

Survivin(16)

Amersham Imager 680

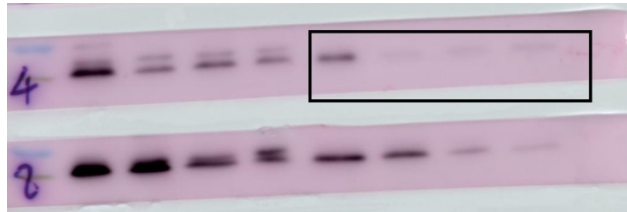

Cleaved caspase3(19)

Amersham Imager 680

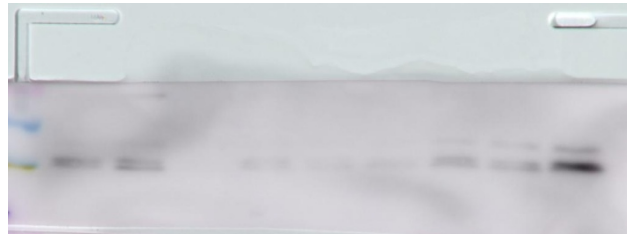

GAPDH(36)

Amersham Imager 680

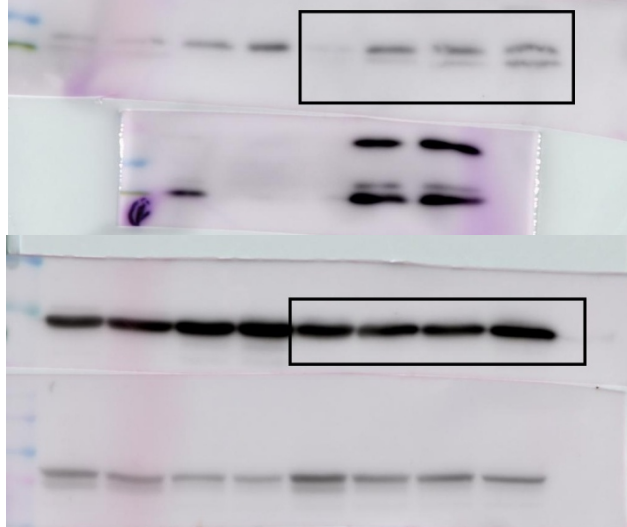

C-myc(51)

Storm scanner

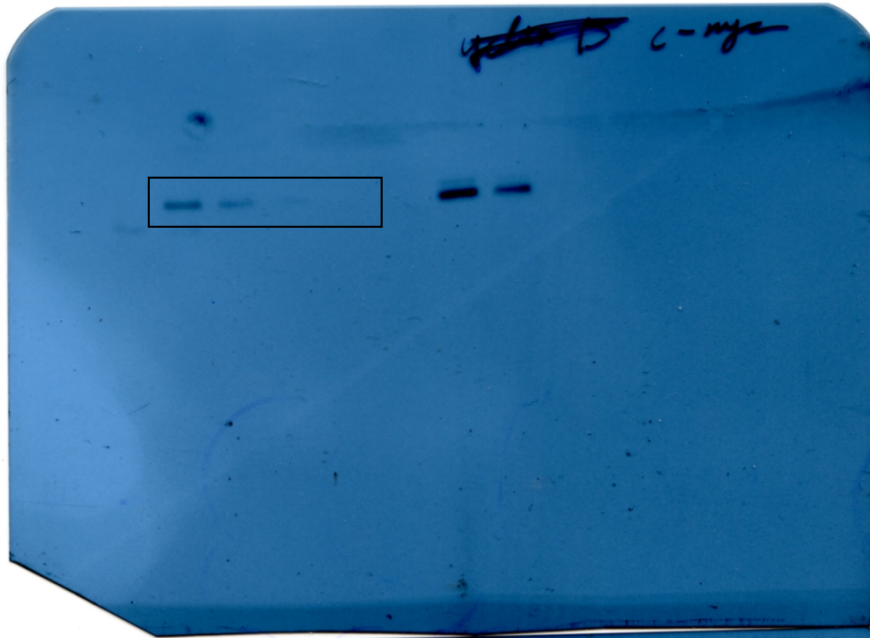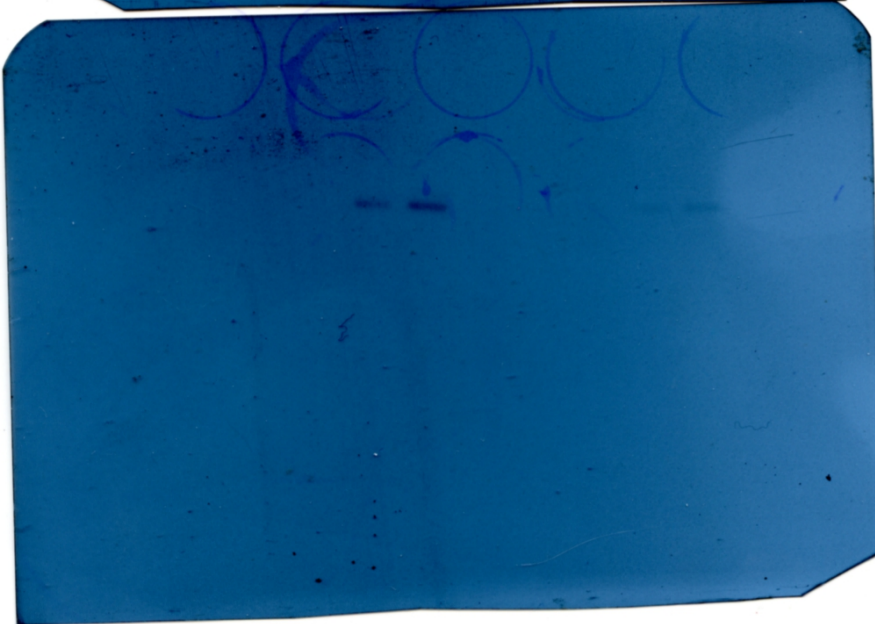

LLL12B( $\mu$ M) 0 0.5 1.0 2.5

## CAOV3

**p-STAT3(86)**

Amersham Imager 680

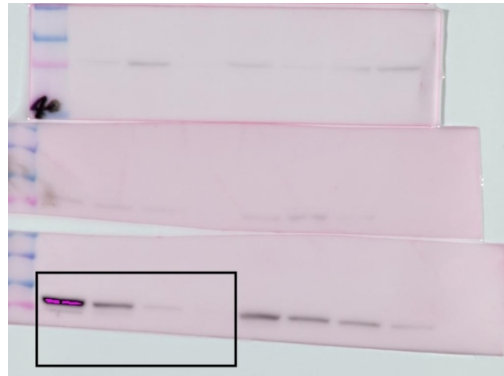

**STAT3(86)**

Amersham Imager 680

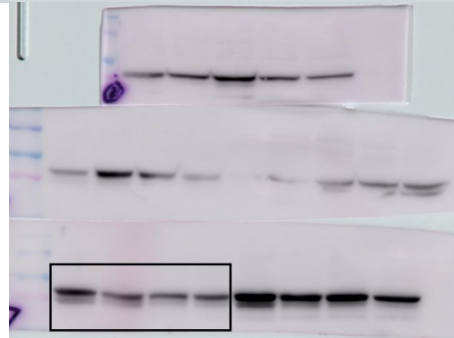

**c-myc(51)**

Amersham Imager 680

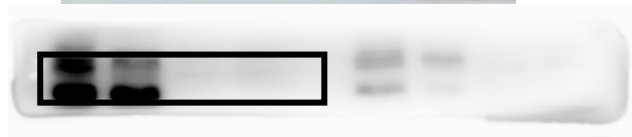

**Survivin(16)**

Amersham Imager 680

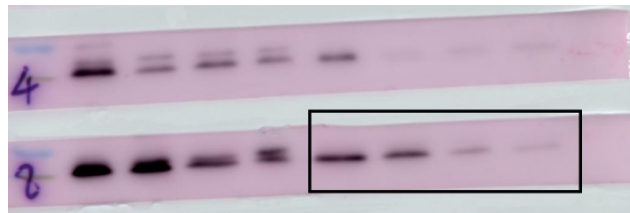

**cleaved caspase3(19)**

Amersham Imager 680

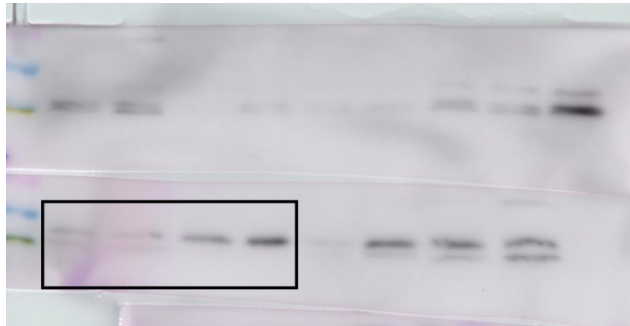

**GAPDH(36)**

Amersham Imager 680

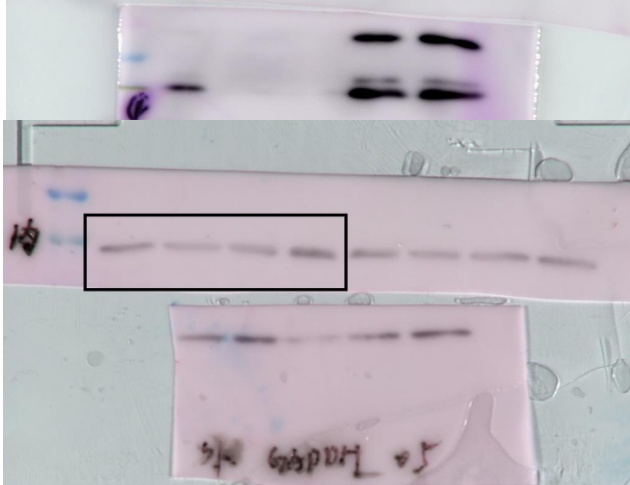

**cyclinD1(36)**

Storm scanner

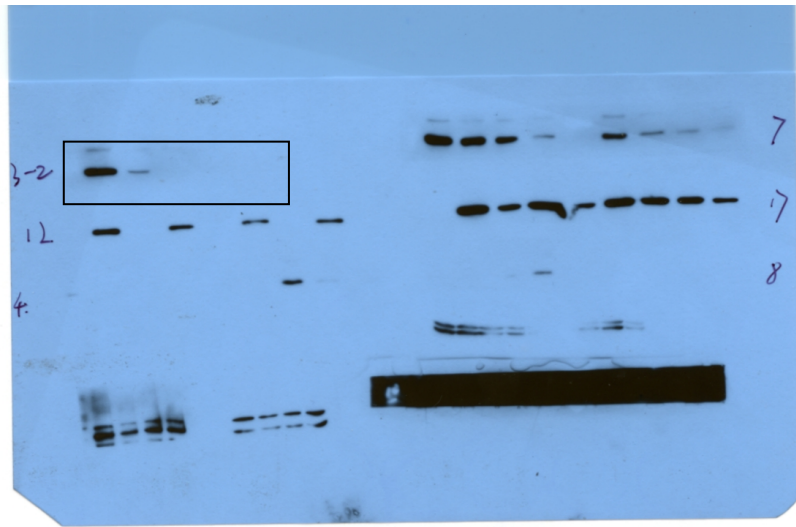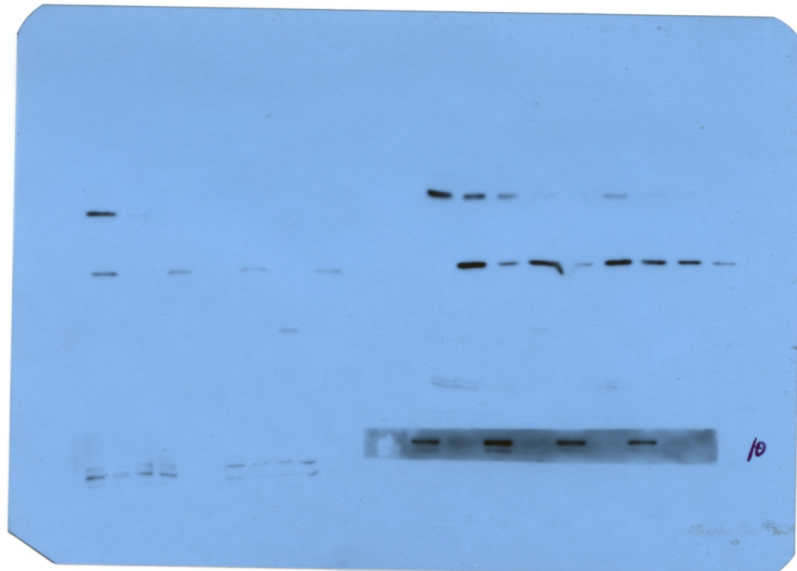

LLL12B( $\mu$ M) 0 0.1 0.25 0.5

## OVCA5

**p-STAT3(86)**

Amersham Imager 680

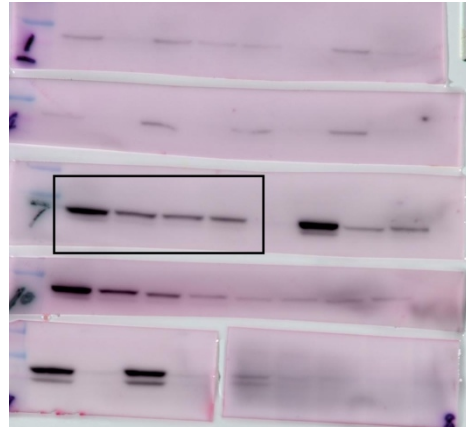

**STAT3(86)**

Amersham Imager 680

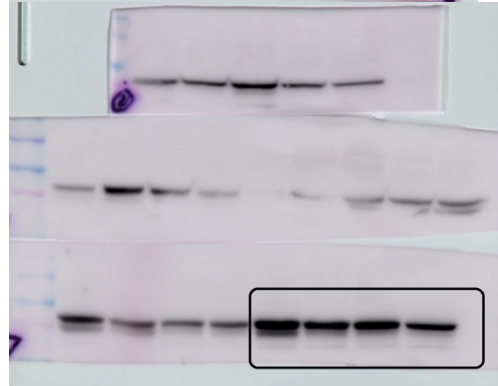

**survivin(16)**

Amersham Imager 680

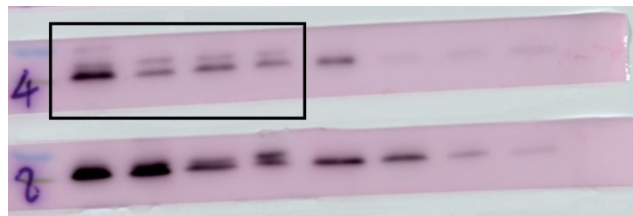

**cleave caspase3(19)**

Amersham Imager 680

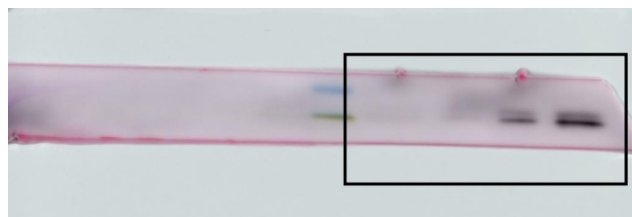

**GAPDH(36)**

Amersham Imager 680

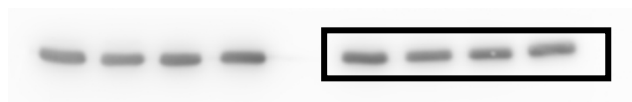

C-myc(51)

Storm scanner

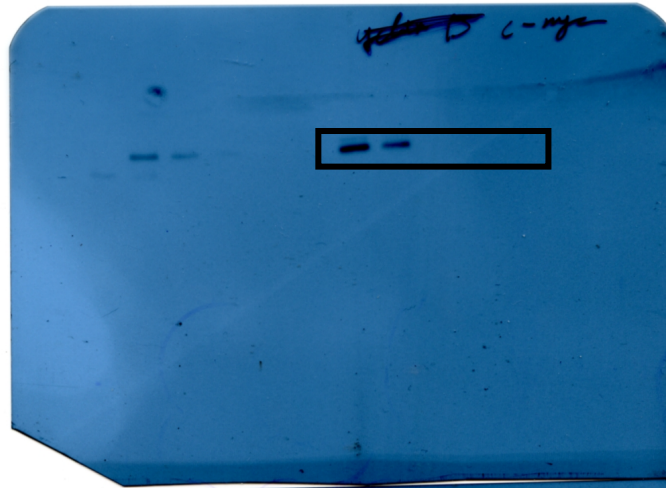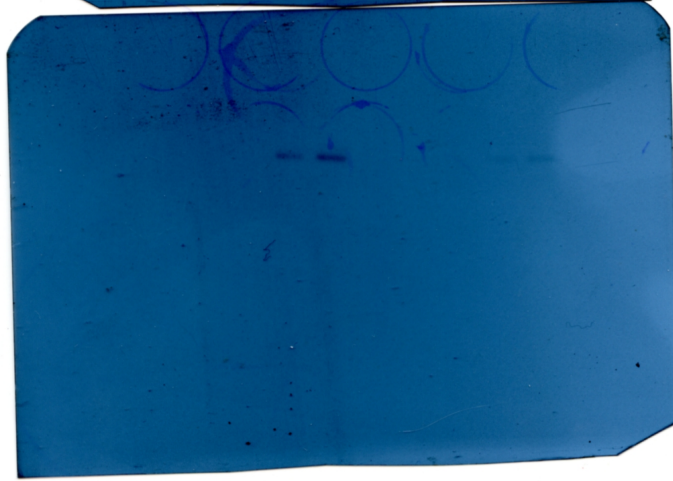

cyclinD1(36)

Storm scanner

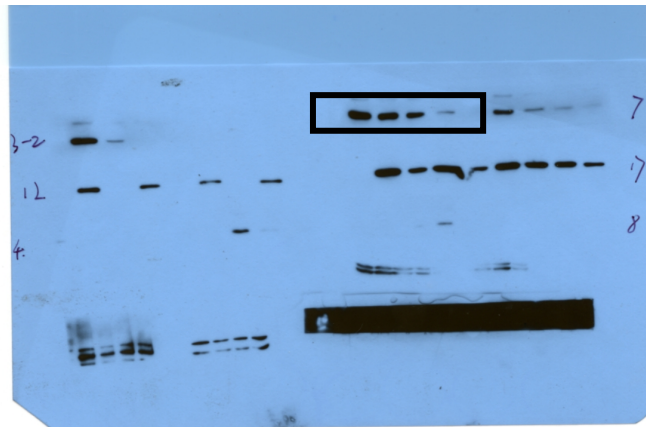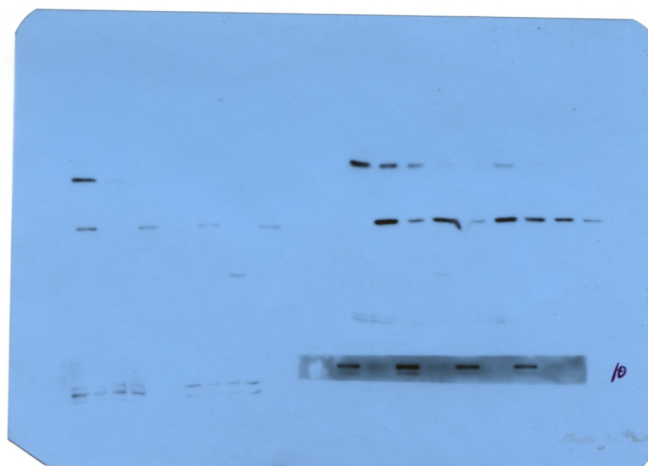



DMSO L0.5 C2.5 L+C P0.5 L+P

## CAOV3

**p-STAT3(86)**

Amersham Imager 680

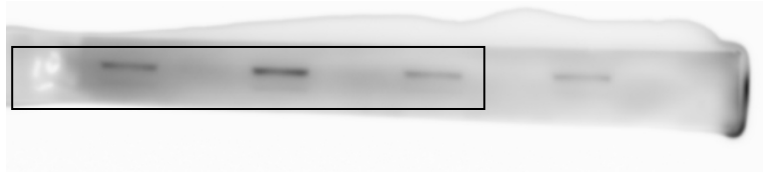

**c-myc(51)**

Amersham Imager 680

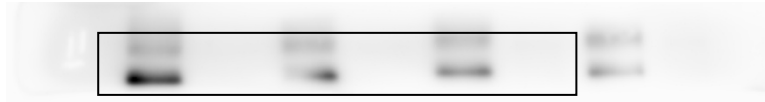

**survivin(16)**

Amersham Imager 680

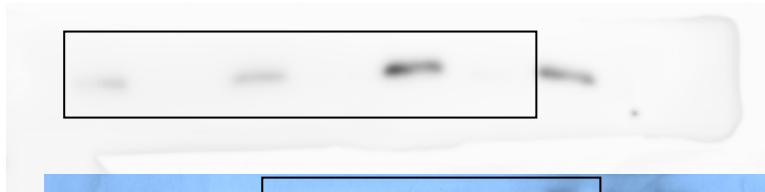

**cleaved caspase3(19)**

storm scanner

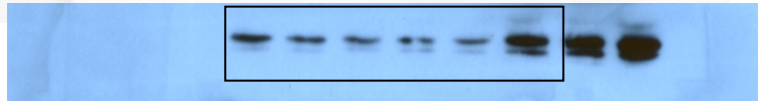

**GAPDH(36)**

Amersham Imager 680

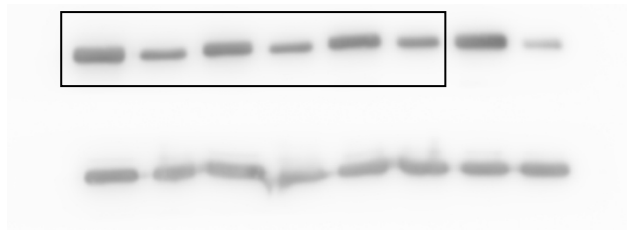

STAT3(86)

Storm scanner

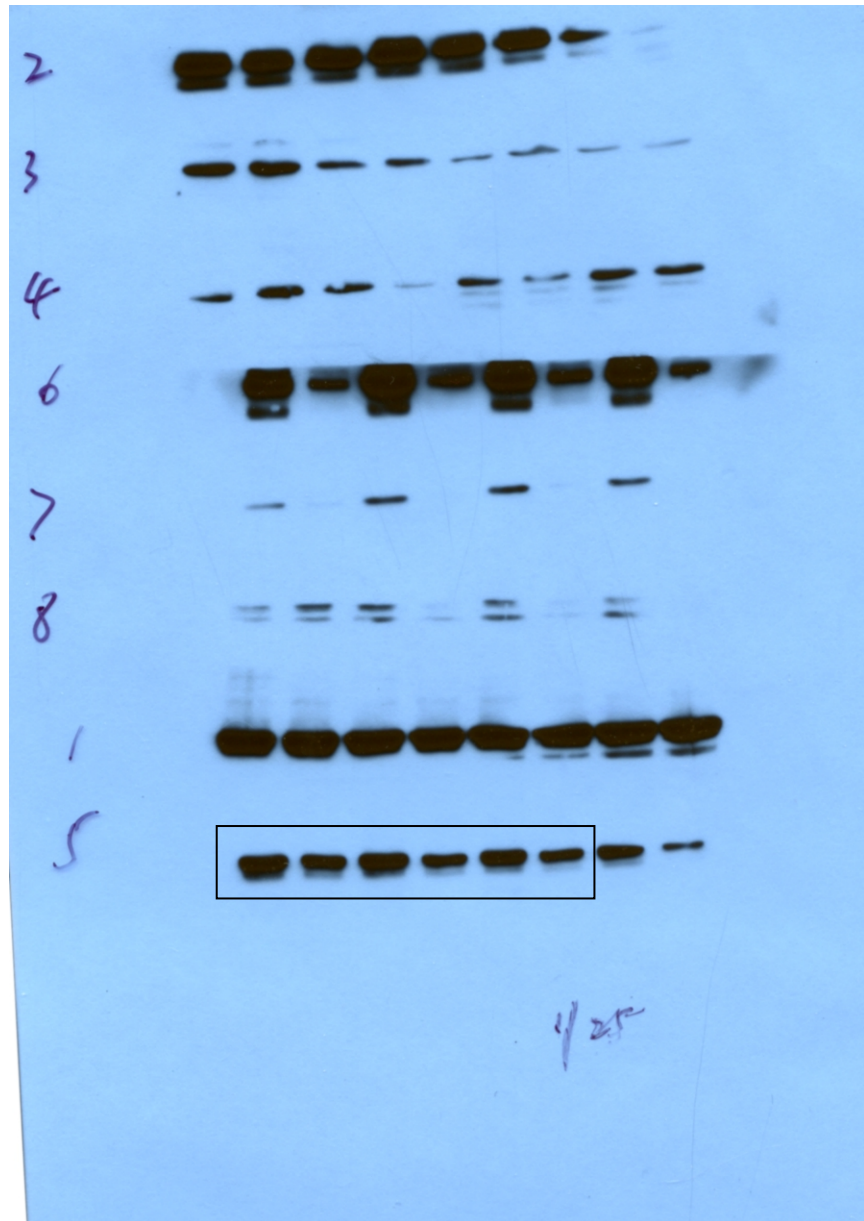

**cyclinD1(36)**

Storm  
scanner

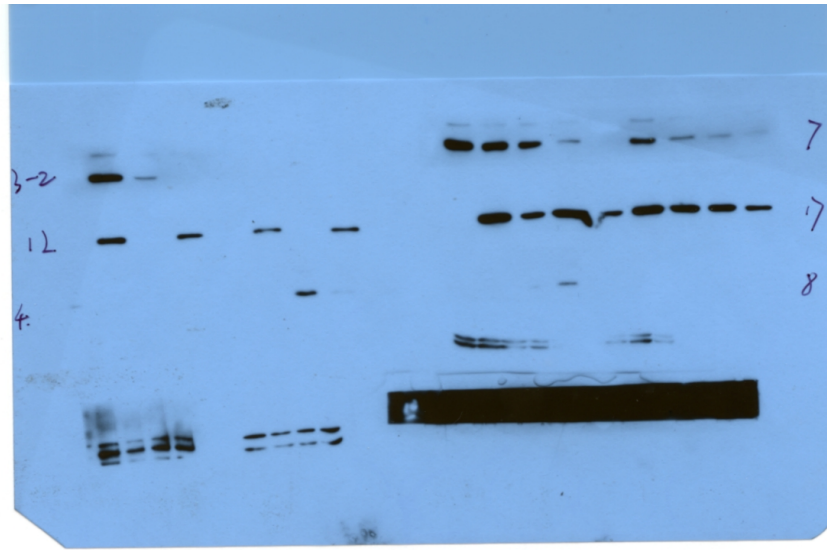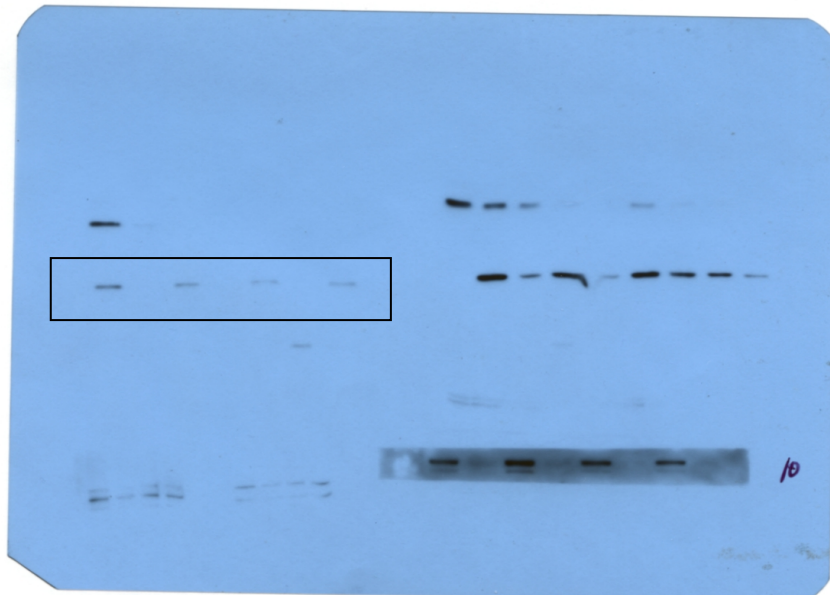

DMSO L0.1 C 2.5 L+C P0.25 L+P

## OVCAR5

p-STAT3(86)

Amersham Imager 680

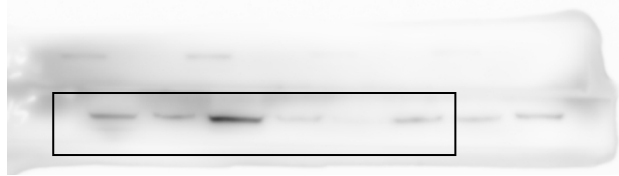

c-myc(51)

Amersham Imager 680

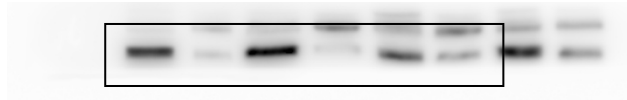

survivin(16)

Amersham Imager

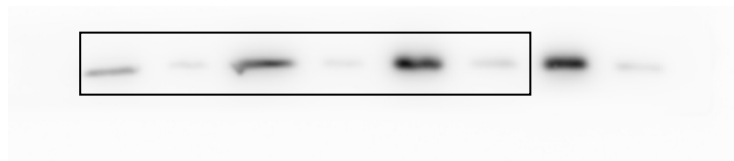

680

cleaved  
caspase3(19)

Storm scanner

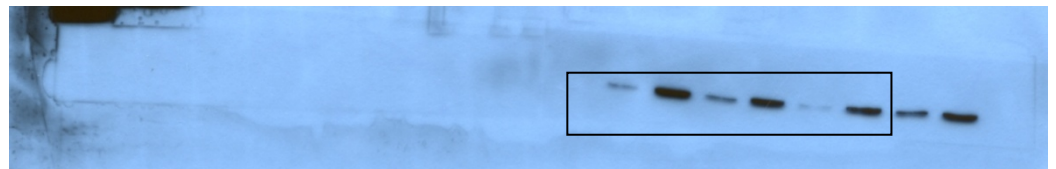

GAPDH(36)

Amersham Imager 680

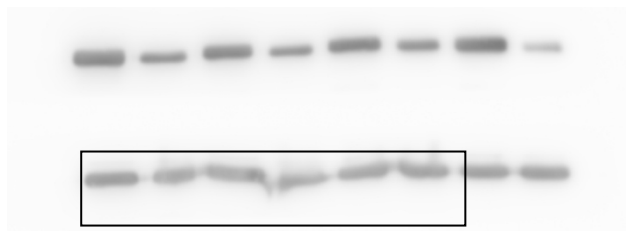

STAT3(86)

Storm scanner

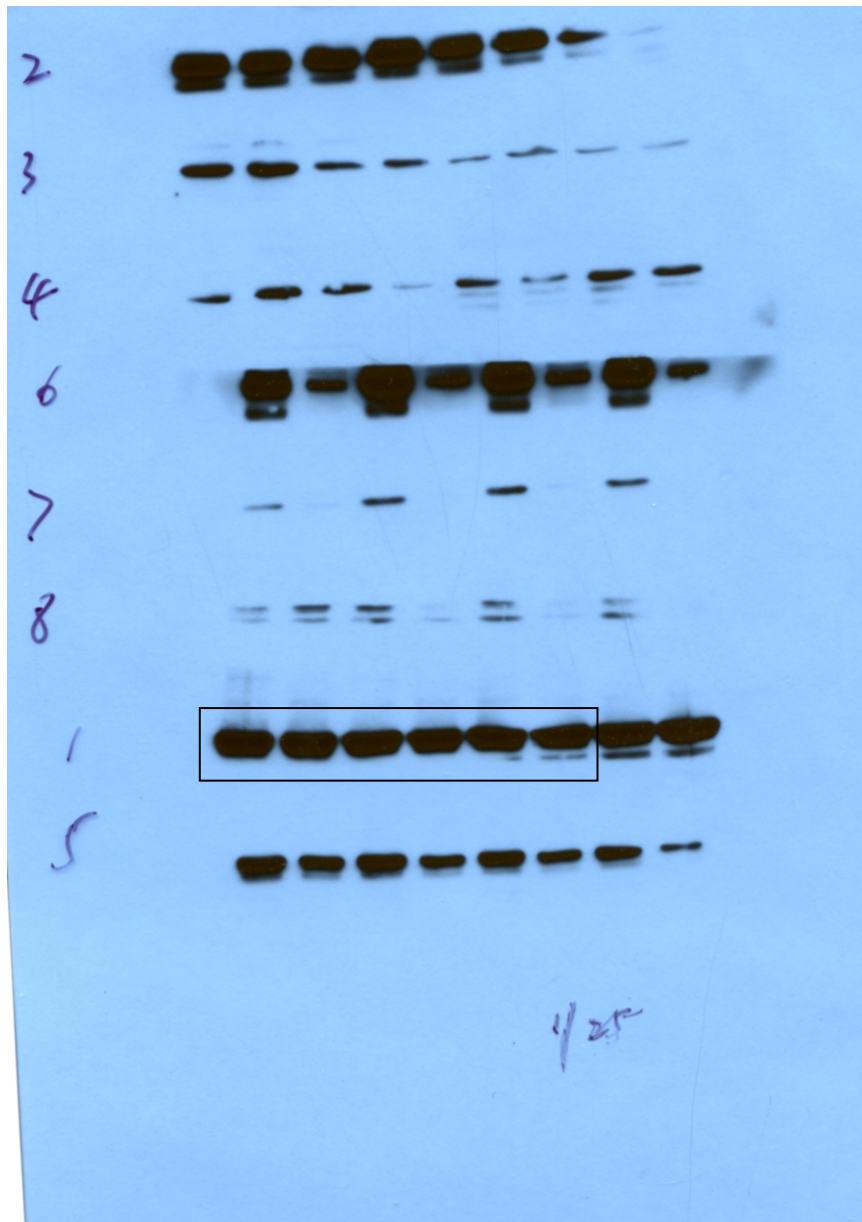

**cyclinD1(36)**

Storm scanne

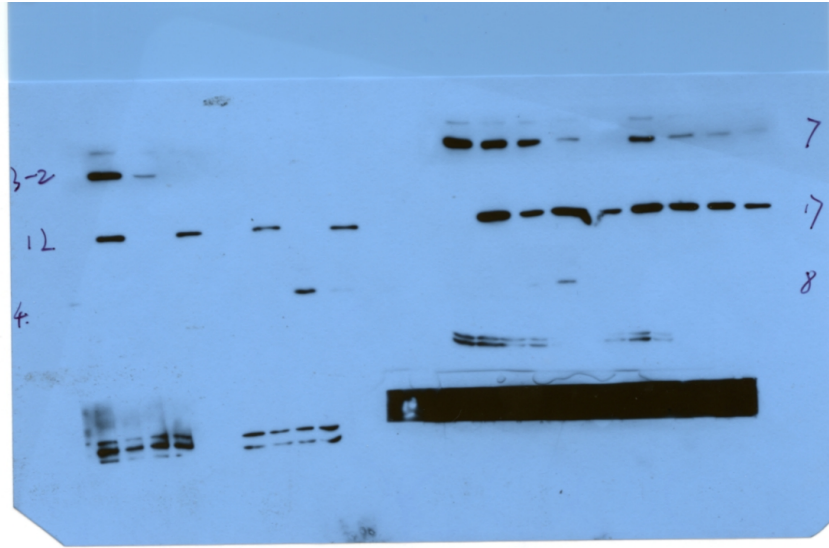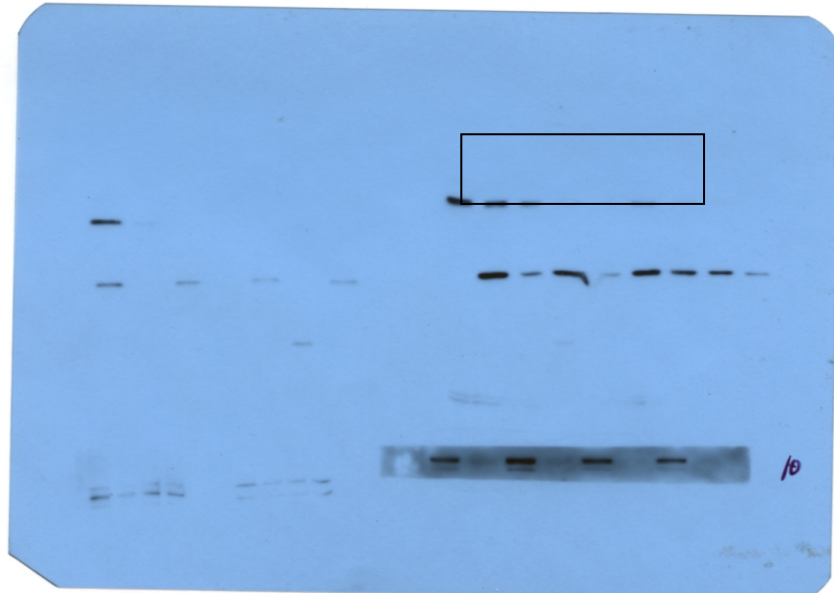

DMSO L0.5 C2.5 L+C P0.01 L+P

### SKOV3

p-STAT3(86)

Amersham Imager

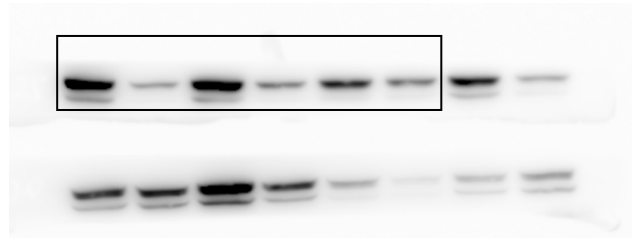

680

STAT3(86)

Amersham Imager

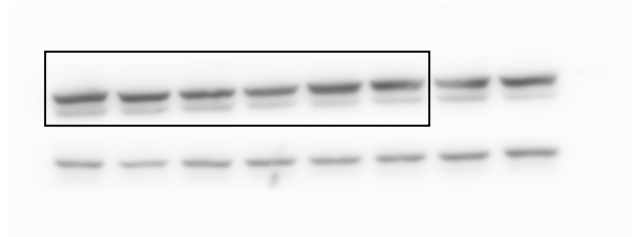

680

c-myc(51)

Amersham Imager

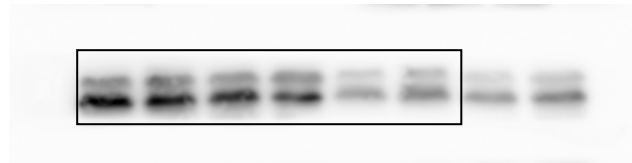

680

cyclinD1(36)

Amersham Imager

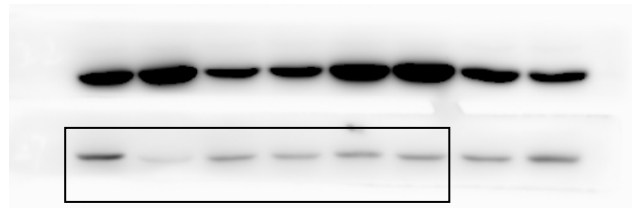

680

Storm scanner

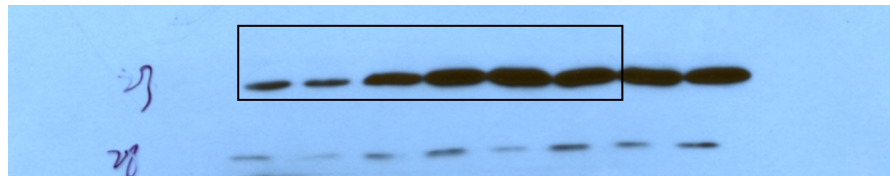

**GAPDH(36)**

**Survivin(16)**

Storm scanner

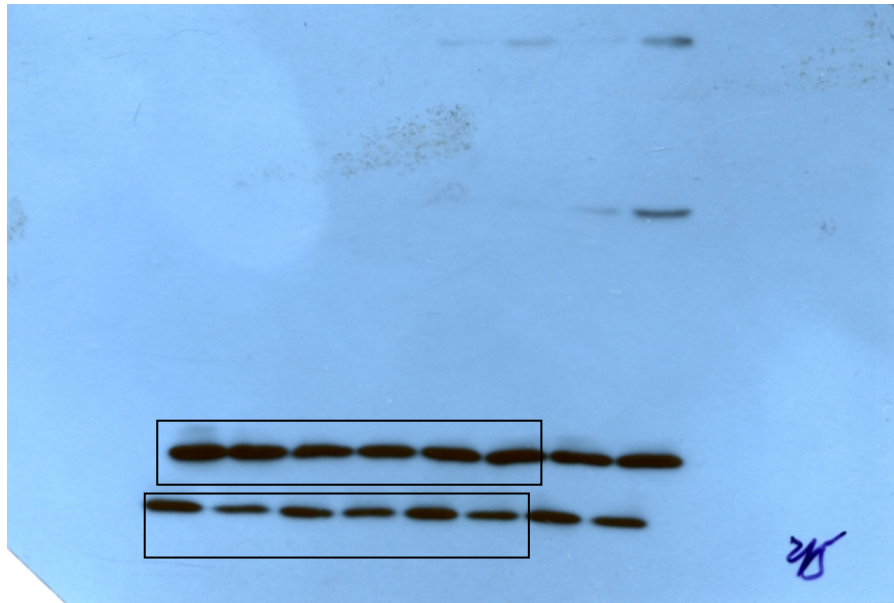

Supplement: pone.0240145.s001.pdf [file pone.0240145.s001.pdf]
